# Role of slow temporal dynamics in reliable activity of stochastically driven neurons

Subhadra Mokashe<sup>1,2</sup> and Suhita Nadkarni<sup>1,\*</sup>

<sup>1</sup>Computational Neurobiology Laboratory, Division Of Biology, Indian Institute of Science Education and Research, Pune, India

<sup>2</sup>Neuroscience Graduate Program, Brandeis University, MA, USA.

Correspondence\*:  
Suhita Nadkarni  
suhita@iiserpune.ac.in

## 2 ABSTRACT

3 Neuronal networks maintain robust patterns of activity despite a backdrop of noise from various  
4 sources. Mutually inhibiting neurons is a standard network motif implicated in rhythm generation.  
5 In an elementary network motif of two neurons capable of swapping from an active state to a  
6 quiescent state, we ask how different sources of stochasticity alter firing patterns. In this system,  
7 the alternating activity occurs via combined action of a calcium-dependent potassium current,  
8 sAHP (slow afterhyperpolarization), and a fast GABAergic synapse. We show that simulating  
9 extrinsic noise arising from background activity extends the dynamical range of neuronal firing.  
10 Extrinsic noise also has the effect of increasing the switching frequency via a faster build-up  
11 of sAHP current. We show that switching frequency as a function of input current has a non-  
12 monotonic behavior. Interestingly the noise tolerance of this system varies with the input current.  
13 It shows maximum robustness to noise at an input current that corresponds to the minimum  
14 switching frequency between the neurons. The slow decay time scale of sAHP conductance  
15 allows neurons to act as a low-pass filter, attenuate noise, and integrate over ion channel  
16 fluctuations. Additionally, we show that the slow inactivation time of the sAHP channel allows the  
17 neuron to act as an action potential counter. We propose that this intrinsic property of the current  
18 allows the network to maintain rhythmic activity critical for various functions, despite the noise,  
19 and operate as a temporal integrator.

20 **Keywords:** stochasticity, regular rhythmic activity, CPG, Gillespie algorithm, extrinsic noise, intrinsic noise, reliability

21 Several key brain functions critically depend on the reliable activity of neuronal networks. One of the  
22 enduring questions in Neurosciences has been to understand how neurons generate robust activity patterns  
23 despite an inherently noisy framework. Here we ask how noise arising from intrinsic sources such as  
24 thermal fluctuations ion channels and extrinsic sources such as a variable input affects activity in an  
25 illustrative network capable of generating rhythms. The network consists of two neurons connected by  
26 an inhibitory fast GABAergic synapse that causes neurons to switch off as synaptic current builds up  
27 (See Figure 1). Mutually inhibitory networks of neurons -are a recurring motif across brain areas, for  
28 example; in the hippocampus (Pelkey et al., 2017), central pattern generators associated with locomotion  
29 and digestion (Otto Friesen, 1994), insect olfactory systems (Daun et al., 2009), REM sleep cycle (Lu et al.,  
30 2006), and working memory (Myre and Woodward, 1993). The on-off switching activity of neurons allows  
31 them to be associated with multiple networks (Hooper and Moulins, 1989). It dictates sequential order of  
32 activity required, for example, locomotion (Cangiano and Grillner, 2004) and spatial navigation Dragoi  
33 and Buzsáki (2006).

34 In the system described in Figure 1, switching occurs due to an action potential (AP) triggered build-up  
35 of a calcium-dependent potassium current, specifically called slow after-hyperpolarization (sAHP). The  
36 potassium current causes the neuronal membrane to be hyperpolarized. This hyperpolarization is long-  
37 lasting due to the intrinsic slow closing time of the sAHP channel. As the potassium current builds up, it  
38 makes it incrementally harder for the neuron to fire an AP in response to a stimulus (conductance of sAHP  
39 grows with every calcium spike that closely follow APs). Eventually, the neuron unable to generate an  
40 action potential, deactivates the inhibitory synaptic current (GABAergic) to the connected neuron. This  
41 release from inhibition enables the other neuron to fire action potentials, creating the 121212 activity  
42 pattern. A detailed chronology of events is as follows: Strong DC input is applied to both the neurons  
43 (with identical intrinsic properties but slightly different initial conditions). The neuron with advantageous  
44 initial conditions takes over and generates action potentials. The resulting synaptic current inhibits activity  
45 in the other neuron via a GABA synapse. In the active neuron, in the meantime, APs cause the opening  
46 of voltage-gated calcium channels (VGCCs). VGCCs follow the open-close action of APs closely. The  
47 incoming calcium flux through VGCCs activates the sAHP channels (Figure 1 B top three panels). sAHP  
48 channels respond rapidly to calcium. However, as the name suggests, sAHP channels inactivate slowly;  
49 therefore, with each calcium pulse, the number of active sAHP channels increases. The slow closing  
50 time of the channels allows them to remain open even after calcium channels are closed and calcium is  
51 extruded out, ensures that potassium builds over multiple action potentials. Beyond a hyperpolarization  
52 threshold induced by the potassium current, the neuron is disabled. Thus the action of sAHP terminates  
53 the AP activity after a characteristic time interval governed by the potassium current build-up (Manira  
54 et al., 1994)(Figure 1 B top third panel). The termination of the burst of APs puts an end to the active  
55 inhibitory synapse. The other neuron gets activated now and completes the rhythmic pattern(Figure 1 B  
56 bottom panel).

57 The overall time over which a single neuron in this network remains active is a function of inactivation  
58 time constant of the sAHP current and synaptic current, stimulus strength, calcium ion flux, intrinsic noise  
59 due to fluctuations of ions channels, and extrinsic noise arising out of modulation of the stimulus (Figure 1  
60 A) (Figure 1 B third top panel). These contribute to the potassium current differentially and dictate the  
61 burst interval.

62 Effects of various sources of noise on system behavior and, generally on brain function have been  
63 extensively investigated (Goldwyn and Shea-Brown, 2011). Noise can be both disruptive and enhance  
64 function (Stacey and Durand, 2001). The addition of noise can increase signal detection and transduction  
65 via stochastic resonance in Hippocampal CA1 neurons. (McDonnell and Abbott, 2009; Schmid et al., 2001;  
66 Stacey and Durand, 2001). Coherence resonance is another interesting phenomenon that arises due to  
67 noise but increases the regularity of activity (Andreev et al., 2018). Apart from these external sources of  
68 noise (extrinsic noise), intrinsic sources of variability such channel fluctuations can also modify function  
69 (Schmid et al., 2001). Noisy opening and closing of voltage-gated calcium channels can allow intracellular  
70 calcium influx and trigger downstream calcium-mediated signals, make the neuron more excitable, allow  
71 transmission of subthreshold signals (White et al., 2000) and cause a post-inhibitory rebound effect (Tegnér  
72 et al., 1997).

73 Here we systematically investigate the consequences of significant sources of intrinsic and extrinsic noise  
74 on the reliability of switching in an essential functional network capable of rhythmic behavior: two neurons  
75 connected by an inhibitory synapse (Figure 1 ). The effect of extrinsic noise is studied by varying the  
76 amplitude of the current noise. It has been shown that voltage-gated calcium channels (VGCCs) fluctuations  
77 are one of the main contributors to the stochasticity at the synapse (Modchang et al., 2010). We study the

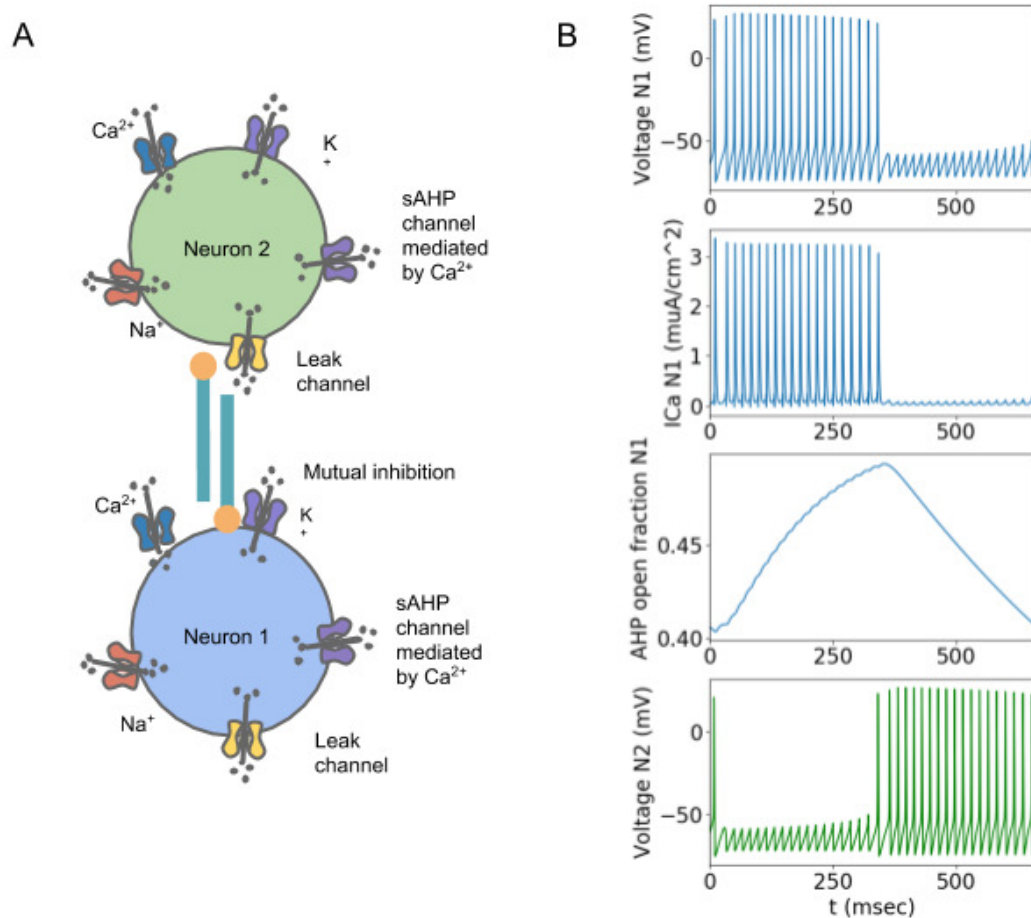

**Figure 1.** Network and switching mechanism: A. The network of mutually inhibiting neurons along with the ion channels which orchestrate the firing and switching activity of the neurons. B. Top to bottom: Neuron fires action potentials due to depolarization driven by the external current. Calcium channels open a result of depolarization of the membrane leading to calcium ion influx. The build-up of sAHP current over multiple action potentials leads to termination of burst in neuron 1. Escape from inhibition and burst of the neuron 2.

78 influence of intrinsic noise arising from channel fluctuations of the VGCCs. We ask how calcium channel  
79 noise modulates sAHP conductance and, in turn, changes the switching rate.

## 1 METHODS

80 We used a ionic conductance-based model of neurons that are connected to each other via an inhibitory  
81 synapse. The potassium current, sAHP (slow afterhyperpolarization) which is mediated by calcium ions  
82 orchestrates switching in the network (equations (1), (2)). Extrinsic noise is interpreted as the noise arising  
83 independently of the state of the neuron, such as the background noise, and is implemented here as an  
84 additive term  $\xi$  to the differential equation of the voltage (equations (1), (2)). In contrast, intrinsic noise  
85 depends on the state of the neuron. It is implemented in the model as the stochasticity associated with  
86 a small number of ion channels and stochastic channel opening. To model realistic intrinsic noise, we  
87 simulate a Markovian description of the calcium channels using the Gillespie algorithm.

## 88 1.1 Network model

89 The neurons have voltage-gated calcium channels, and sAHP channels along with voltage-gated sodium  
90 and potassium channels leak current and extrinsic noise.

$$C \frac{dV_1}{dt} = I_{external} - I_{Na} - I_K - I_{Leak} - I_{synapse} - I_{VGCC} - I_{sAHP} + \text{noise amplitude } \xi_1 \quad (1)$$

91

$$C \frac{dV_2}{dt} = I_{external} - I_{Na} - I_K - I_{Leak} - I_{synapse} - I_{VGCC} - I_{sAHP} + \text{noise amplitude } \xi_2 \quad (2)$$

## 92 1.2 Hodgkin-Huxley Neuron Model

93 The classical Hodgkin-Huxley neuron model describes how neurons generate action potentials (Hodgkin  
94 and Huxley, 1990). It has  $Na^+$ ,  $K^+$ , and leak channels given by,

$$C \frac{dV}{dt} = -\bar{g}_{Na} m^3 h (V - E_{Na}) I - \bar{g}_K n^4 (V - E_K) - g_L (V - E_L) - I \quad (3)$$

95

$$\frac{dx}{dt} = \alpha_x (1 - x) - \beta_x x \quad \text{where, } x = n, m, h \quad (4)$$

Where,

$V$ : membrane potential

$n, m, h$ : gating variables which represent the open fraction of channels of sodium ( $m, h$ ) and potassium( $n$ ).

$C = 1 \mu F/cm^2$ : the capacitance of the cell membrane

$E_{Na} = 50$  mV,  $E_K = -77$  mV, and  $E_L = -54.4$  mV: reversal potentials of sodium, potassium and leak channels respectively.

$\bar{g}_{Na} = 120$  mS/cm<sup>2</sup> and  $\bar{g}_K = 36$  mS/cm<sup>2</sup>: maximal conductances of sodium and potassium currents respectively.

$g_L = 0.3$  mS/cm<sup>2</sup>: leak conductance

$$\alpha_m = \frac{.1(V + 40)}{1 - \exp(-.1(V + 40))} \quad (5)$$

$$\beta_m = 4.0 \exp(-(V + 65)/18.0) \quad (6)$$

$$\alpha_h = .07 \exp((V + 65)/20.0) \quad (7)$$

$$\beta_h = \frac{1}{1 + \exp((V + 35)/10)} \quad (8)$$

$$\alpha_n = \frac{.01(V + 55)}{1 - \exp(-(V + 55)/10)} \quad (9)$$

$$\beta_n = 0.125 \exp(-(V + 65)/80.0) \quad (10)$$

$$I_{Na} = g_{Na} m^3 h (V - E_{Na}) \quad (11)$$

$$I_K = g_K n^4 (V - E_K) \quad (12)$$

$$I_{Leak} = g_{leak} (V - E_{Leak}) \quad (13)$$

### 96 1.3 sAHP channels

97 The model for calcium-mediated potassium current, sAHP is based on the sAHP channels of CA1  
98 pyramidal neurons (Sah and Clements, 1999) (Stanley et al., 2011).

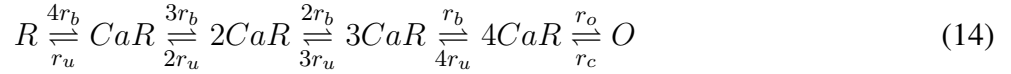

99 Where  $r_b = 4 \mu\text{M}/\text{sec}$ ,  $r_u = 0.5/\text{sec}$ ,  $r_o = 600/\text{sec}$ , and  $r_c = 400/\text{sec}$ . Here R, CA1R, CA2R, CA3R, CA4R,  
100 and O are the states of the channel. R is the closed state, and O is the open state. The total conductance of  
101 the channel is dependent on the fraction of open channels. The peak open probability of the channel is  
102 0.4, and its mean open time is 2.5 msec. When  $[Ca^{2+}]_i$  falls rapidly, the decay of sAHP is limited by the  
103 channel closing and  $Ca^{+2}$  dissociation rates to give a time constant of 1.5 sec (Sah and Clements, 1999).

$$I_{sAHP} = g_{sAHP}(V - E_{sAHP}) \quad (15)$$

104 Where  $g_{sAHP} = 0.4 \mu\text{S}/\text{cm}^2$  and  $E_{sAHP} = E_K = -77 \text{ mV}$

### 105 1.4 Synapse

106 Inhibitory synapses are modelled using a tan hyperbolic function.

$$\rho = \frac{\tanh(\frac{V}{4})}{2} \quad (16)$$

$$\frac{ds}{dt} = \frac{\rho}{\tau_r}(1 - s) - \frac{1}{\tau_d}s \quad (17)$$

$$I_{syn} = \bar{g}_{syn}(V - E_{syn}) \quad (18)$$

109 Where  $\bar{g}_{syn} = 2.2 \text{ mS}/\text{cm}^2$ ,  $E_{syn} = -80 \text{ mV}$ ,  $\tau_r = 0.3 \text{ msec}^{-1}$  and  $\tau_d = 8.9 \text{ msec}^{-1}$ .

### 110 1.5 Voltage gated calcium channels

111 We model the L-type  $Ca_{v1.3}$  calcium channels which open at low voltages given by (Stanley et al., 2011).

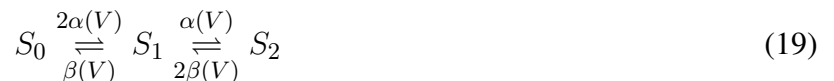

$$\alpha(V) = \frac{\sqrt{x_\infty}}{\tau} \quad (20)$$

$$\beta(V) = \frac{1 - \sqrt{x_\infty}}{\tau} \quad (21)$$

$$x_{\infty}(V[mV]) = \frac{1}{1 + e^{-\frac{(V+30)}{6}}} \quad (22)$$

112 Here  $\alpha, \beta$  are voltage dependent probabilities of transitions of states  $S_i$ . The conductance is dependent  
113 on the fraction of open state.

$$I_{Cav} = g_{Cav}(V - E_{Cav}) \quad (23)$$

114 Where  $g_{cav} = 0.15 \text{ mS/cm}^2$  and  $E_{cav} = E_{Ca} = 25 \text{ mV}$

## 115 1.6 Modelling calcium dynamics

116 The intracellular calcium concentration dynamics is modeled as a leaky integrator, (Stanley et al., 2011)  
117 (Wang, 1998).

$$\frac{d[Ca^{2+}]}{dt} = (-\alpha I_{Cav}) - \frac{([Ca^{2+}])}{\tau_{Ca}} \quad (24)$$

118 Where  $\alpha = 2.10^{-4} [mM(msec\mu A)^{-1}cm^2]$  and  $\tau_{Ca} = 14 \text{ ms}$ .  $\alpha$  depends on the area to volume ratio of  
119 the neuron, intracellular buffering of calcium, and stochasticity factor, and converts calcium current into  
120 the units of calcium concentration per unit time. The resting calcium concentration is 100 nM and goes up  
121 to 2.5  $\mu M$  per spike.

## 122 1.7 Modelling channel noise

123 For large channel numbers, the fluctuations in the conductance of channels are small and can be  
124 modeled using deterministic dynamics. However, a small number of ion channels typically dictate the  
125 neuronal dynamics. Under these circumstances, the stochasticity of ion channel fluctuations becomes  
126 relevant. Channel noise has been extensively studied, and various methods to model channel noise have  
127 been explored (reviewed in (Goldwyn and Shea-Brown, 2011)). Stochastic dynamics simulated using the  
128 Gillespie algorithm is a fast and accurate algorithm to simulate channel noise (Gillespie, 1976b).

129 Given that the fluctuations arising out of VGCCs are significant contributors to noise in the calcium signal  
130 that ultimately governs switching dynamics, we selectively target the investigation of noise arising from  
131 calcium channel fluctuations. Towards this control experiment, we implement Markovian description only  
132 VGCCs using the Gillespie algorithm (Gillespie, 1976a), whereas the other components of the model are  
133 modeled deterministically. To accurately capture all transitions, We developed an algorithm to implement  
134 the Gillespie algorithm (for Markovian progression) and Euler method (for deterministic progression) in  
135 tandem for a system of equations with multiple timescales that span several orders of magnitude ((Stanley  
136 et al., 2011) (slowAHP  $\tau = 1.5 \text{ s}$ , fast voltage, and calcium dynamics  $\tau=14 \text{ ms}$ ). We call this Gillespie-  
137 Euler Hybrid Algorithm, 'Tandem Progression Gillespie (TPG), used to simulate realistic time scales and  
138 amplitudes of channel noise.

139 In our implementation of the Gillespie Algorithm, we updated the entire system at 1) the fixed time step  
140 dictated by the deterministic part of the model and 2) the waiting times obtained from modeling the calcium  
141 channel dynamics as a Poisson process. This is distinct from Chow and White (1996), where the voltage  
142 is updated only at times dictated by channel transitions. This modification was crucial as the build-up of  
143 sAHP due to calcium fluctuations would be missed between the channel waiting times otherwise. This  
144 would be especially true when the waiting times are longer. Thus by updating the whole system together at

145 a time that arises either out of the calcium channel fluctuations or voltage equations, the dynamics of this  
146 multi-timescale system evolved more accurately via TPG.

147 In the algorithm by Goldwyn et al. (Goldwyn and Shea-Brown, 2011) (Model DB accession number  
148 138950), voltages are updated at a fixed time step. This algorithm is correct under the assumption that  
149 1) The rates for transitions do not change between two time-steps and 2) There are no slow timescales  
150 involved which could keep track of all the fluctuations, as the fluctuations between the fixed time steps may  
151 not be seen by the voltage and other currents in the neuron.

---

**Algorithm 1.** Goldwyn and Shea-Brown Gillespie Modification

---

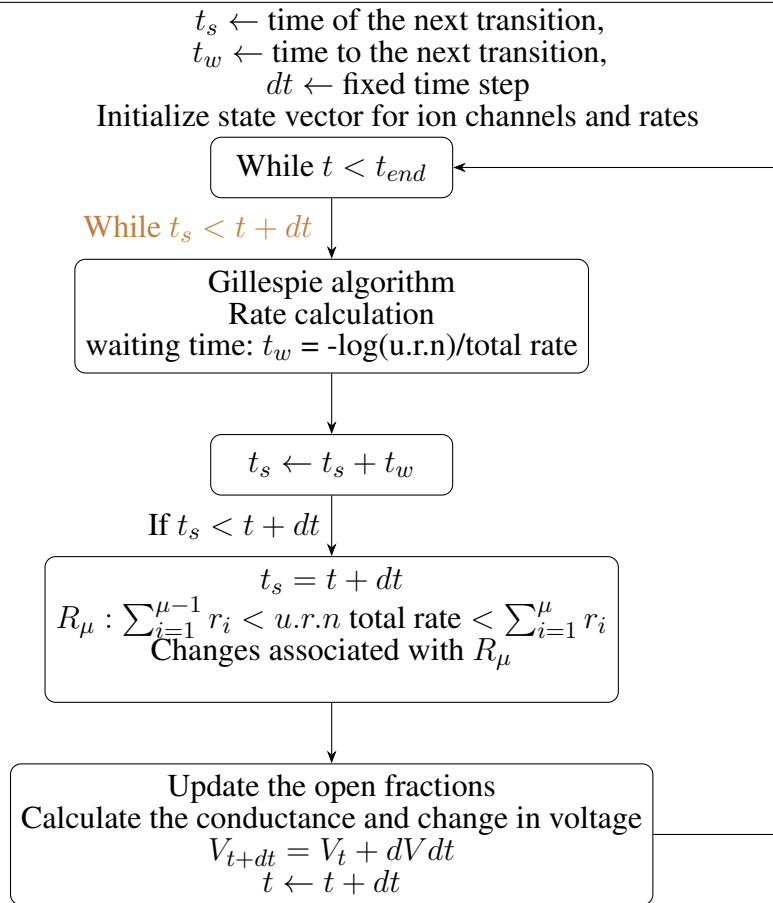

152 Another implementation of the Gillespie algorithm for conductance-based neurons suggested by Chow et  
153 al. (Chow and White, 1996) integrates the deterministic system till the waiting time given by the Gillespie  
154 algorithm and updates the stochastic system only after Gillespie waiting times. This algorithm assumes  
155 that the rate constants do not change during the time step, and the rate and waiting time calculations take  
156 into account the dynamics and time-scales from all the ion channels present in the neuron. Yet another  
157 approach used to model channel fluctuations: the system size expansion approach used by (Fox and Lu,  
158 1994), which involves solving the drift-diffusion equation to accurately model the stochastic dynamics  
159 simulated using the Gillespie algorithm since the Gillespie algorithm is computationally expensive. This  
160 approach was not appropriate as the system is not large enough and also would compromise accuracy.

161 To isolate the influence of noise due to VGCC fluctuations, we use the Markovian kinetic scheme to  
162 simulate channel dynamics, whereas the rest of the system is allowed to evolve deterministically. Since we

**Algorithm 2.** Chow and White Gillespie Modification

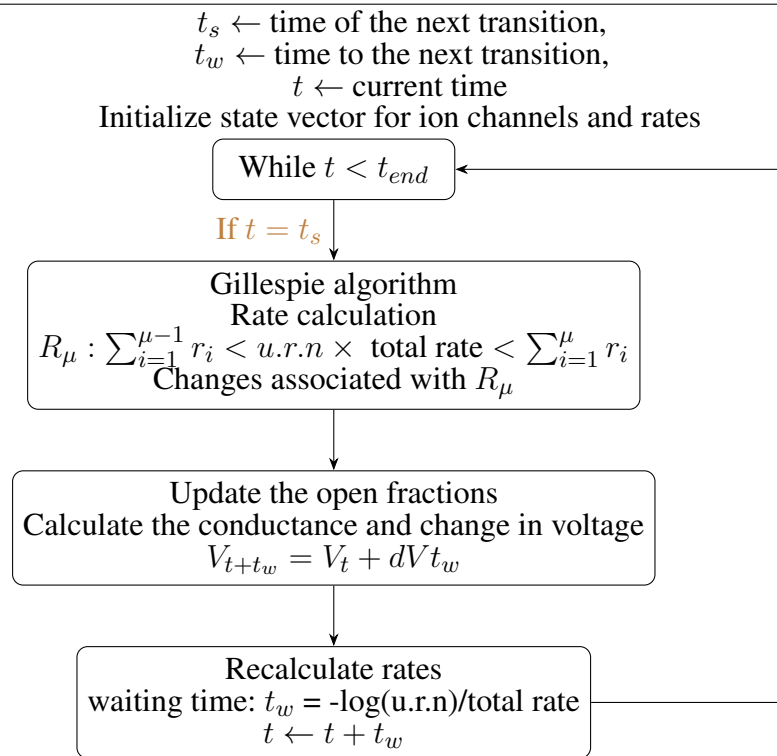

163 wanted to study the effect of the channel noise arising from one type of ion channel, these modifications  
164 were essential. Integrating at fixed time steps as in (Goldwyn and Shea-Brown, 2011) will lead to missing  
165 channel fluctuations that take place between two time-steps. The fast activation and slow decay timescales  
166 associated with the sAHP current will cause the fluctuations caused by a noisy current input to have a  
167 cumulative effect on the sAHP current and significantly modify switching times between neurons. In order  
168 to not miss these fluctuations, we update the whole system deterministic and in 'tandem', the stochastic  
169 system at the Gillespie algorithm determined time-steps. While integrating merely at long waiting times  
170 associated with small channel numbers, the dynamics of the other components of the model neuron may  
171 not be captured correctly and could lead to errors. To model the neuronal dynamics correctly, especially  
172 when the waiting times are longer than a fixed time step (0.01 msec used in simulations), we integrate  
173 the system at the fixed time step and also update the stochastic channel states at every integration step to  
174 take into account the changed voltage and current values. Thus by updating the whole system together,  
175 we believe that we are modeling the stochastic channel dynamics as well as the neuronal and network  
176 dynamics accurately. In summary, in Tandem Progression Gillespie, every component of the model is  
177 updated at the same time and is described in Algorithm 3.

178 For higher channel number, Chow and White and TPG algorithms show similar trends in switching, see  
179 in Figure 2 as most transitions occur at the Gillespie waiting time.

## 180 1.8 Calcium channel opening failures

181 To test how sAHP integrates over irregular and unreliable calcium signal, we induce calcium channel  
182 opening failures with a given probability. Calcium failures are modeled either as individual channel failures  
183 or as ensemble level or pulse failures. Ensemble level failures are calcium pulse failure. Each calcium pulse  
184 can be invisible to the neuron and thus sAHP current with a certain probability (failure rate). The calcium



**Algorithm 3.** Tandem Progression Gillespie

$t_s \leftarrow$  time of the next transition,  
 $t_w \leftarrow$  time to the next transition,  
 $t \leftarrow$  current time,  
 $dt \leftarrow$  fixed time step,  
 Initialize state vector for ion channels and rates

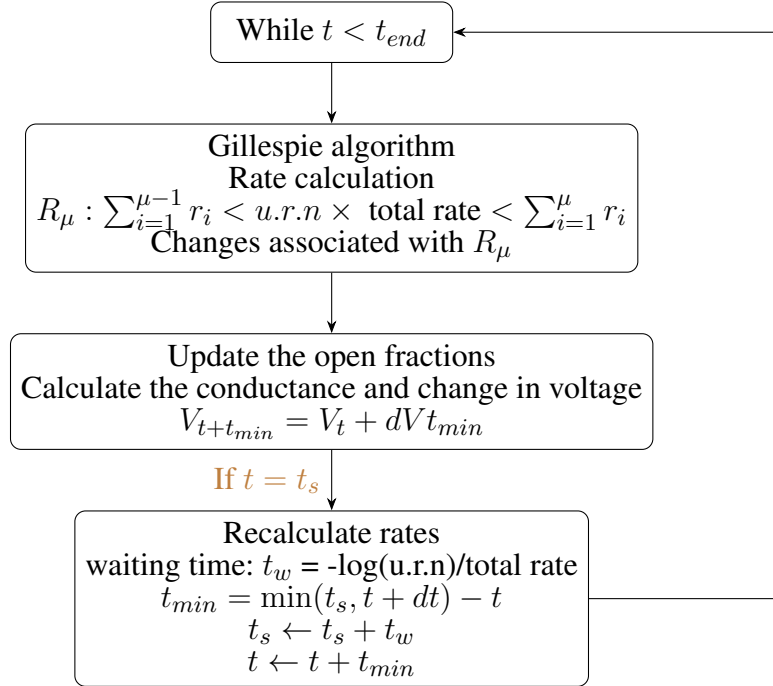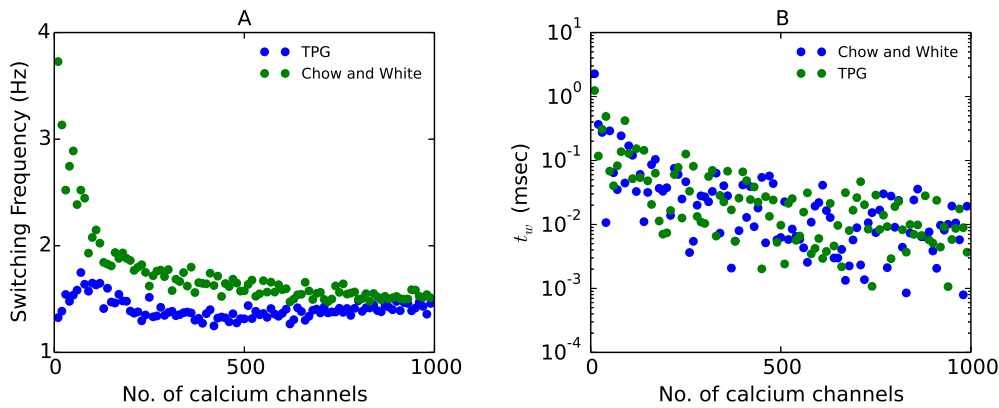

**Figure 2.** Comparison of switching dynamics for TPG and algorithm used in (Chow and White, 1996) A. The mean switching frequency described by TPG, and, Gillespie implementation of Chow and White . B. The CV of interburst intervals for different numbers of calcium channel for the two algorithms.

185 current comes up again after the failed calcium pulse, and the failure is limited to the duration of calcium  
 186 pulse and is carried out by multiplying a voltage-dependent block on the calcium current. In this case, all  
 187 channels fail to open during the block. In the case of an individual channel failure, each channel opening  
 188 transitions fail with a certain failure probability (failure rate), and thus only one channel fails to open.

## 189 1.9 insilico

190 insilico is a C++ based computational tool specifically designed developed to simulate neurons. The  
191 deterministic model is implemented using insilico-0.25  
192 <http://www.iiserpune.ac.in/~collins/insilico/>.

## 193 1.10 Analysis

194 To study the effect of various parameter on the switching dynamics, we look at the burst length and the  
195 switching frequency of the neurons which is the primary functional read-out of the network.

196 **Inter-spike interval and Firing frequency:** The time difference between peaks of two consecutive action  
197 potentials is the inter-spike interval, and the inverse of the inter-spike gives us the firing frequency of the  
198 neuron.

199 **Inter-burst interval and switching frequency:** We define switching frequency as the frequency with  
200 which the neurons alternate in their activity. Burst is defined as a set of action potentials the neuron fires  
201 before the other neuron is released from inhibition and starts firing When the burst terminates because of  
202 sAHP current, and other neuron takes over and inhibits the first neuron, the interval between the last action  
203 potential from the last burst to the first action potential of the next burst of the neuron is called an interburst  
204 interval (IBI). The inverse of IBI is called switching frequency or burst frequency.

The action potential is detected if the voltage goes higher than 15 mV and if such a detection happens after a minimum of time difference of 5 msec after the last detection. A burst is detected when interspike intervals greater than twice the last inter-burst interval. We calculate the switching frequency by finding the inverse of the mean of a fixed number of burst lengths. As a measure of regularity of bursts, coefficient of variation is calculated where  $T$  is the inter-burst interval, is given by,

$$CV = \frac{\sqrt{\langle T^2 \rangle - \langle T \rangle^2}}{\langle T \rangle}$$

## 2 RESULTS

### 205 2.1 Modulation of switching frequency by driving current

206 The total time taken for the activity to switch from one neuron to the other, called the 'Inter-Burst-Interval',  
207 depends on external current stimulus  $I_{ext}$ , its influence on synaptic conductance,  $G_{syn}$ , the time constant of  
208 the synaptic current  $\tau_{syn}$ , the conductance of the sAHP current  $g_{sahp}$ , and the AHP-calcium-binding rates.  
209 For physiologically realistic synaptic coupling strengths and sAHP conductance ( $g_{sahp} = 0.4 \mu S/cm^2$ ,  
210 synaptic conductance =  $2.2 \mu S/cm^2$ ) (Sah and Clements (1999)), the switching of activity between neurons  
211 is modulated over a couple of Hz (0.8 Hz-3 Hz) and observed for an external current between  $13 \mu A/cm^2$   
212 to  $18.75 \mu A/cm^2$ . Switching ceases beyond this range of external current. The dependence of switching  
213 frequency on the external current can be summarized as follows; An increase in driving current makes both  
214 the neurons more excitable and leads to an increase in spiking frequency (Figure 3 A). This increase leads  
215 to an increased rate of calcium spikes and a faster build-up of sAHP current, which can shorten the duration  
216 over which the neuron is active (burst duration). On the other hand, the increase in depolarizing input  
217 drive also increases the hyperpolarization needed to terminate the burst via the sAHP current (expressed in  
218 terms of threshold sAHP open fraction) (Figure 3 B). This has the effect of increasing the duration of the  
219 burst, as it takes longer to reach the threshold sAHP current. The increase in the threshold of the sAHP  
220 current needed to terminate the burst is shown in Figure 3 B. These distinct opposite effects on the rate of

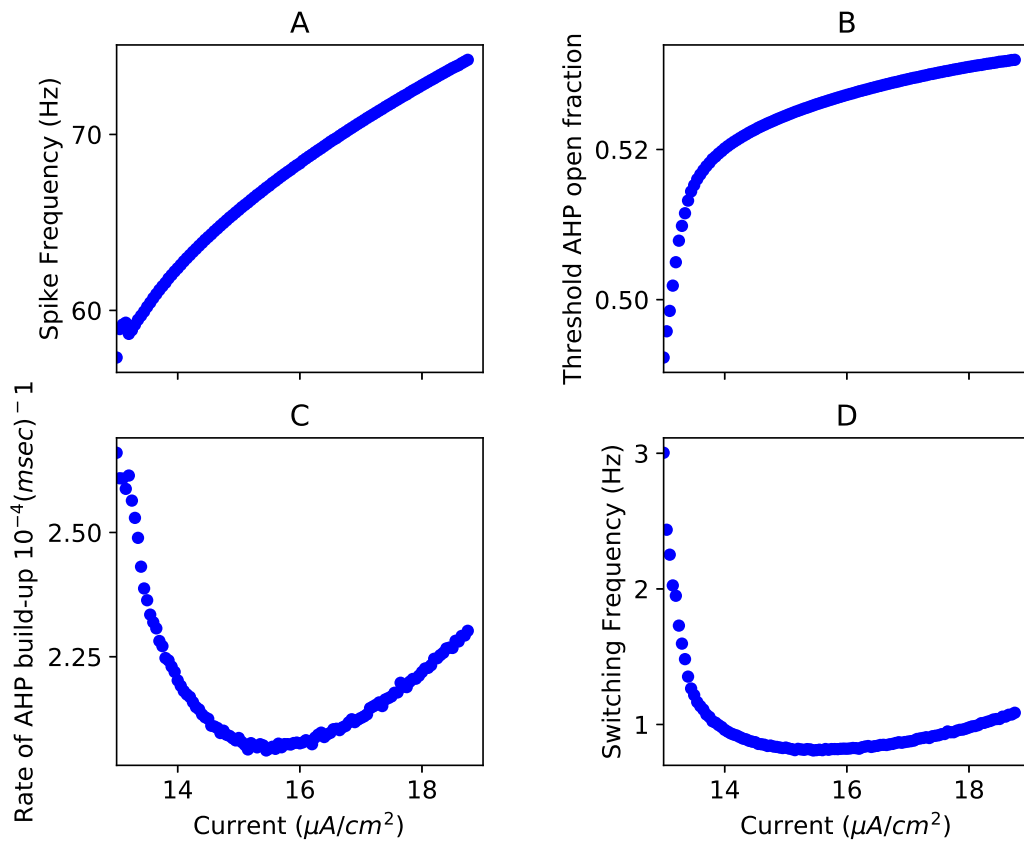

**Figure 3.** Frequency modulation by current: Competition between an increase in excitability and sAHP threshold current leads to non-monotonic changes in switching frequency: A. The spike frequency increases with increasing current. B. The peak sAHP open fraction reached increases monotonically on increasing the current. C. The rate of build-up sAHP current shows a minimum at an intermediate current value. D. The switching frequency shows a non-monotonic dependence on the external current due to two opposing effects that increasing current has on the neuron's excitability.

221 sAHP built-up in response increase in driving current are shown in Figure 3 C. Enhanced depolarization  
 222 dictates the initial decrease in the rate of  $AHP_{\text{threshold}}$  until  $I_{\text{ext}}=16 \mu A/cm^2$ . It is followed by an in the  
 223 rate of the sAHP build-up due to a faster rate of incoming calcium spikes. The initial the spike frequency  
 224 increase causes a decrease in the switching frequency (Figure 3 D). It can be explained by the time taken  
 225 for sAHP to achieve higher conductance levels thus extending the switching time. Between the input  
 226 current  $15 \mu A/cm^2$  and  $16 \mu A/cm^2$ , the frequency of switching remains fixed at 0.8 Hz. However, beyond  
 227  $16 \mu A/cm^2$ , the switching frequency increases as it follows the sAHP build-up rate. Increasing external  
 228 driving current to both the neurons described by  $I_{\text{ext}}$  in equation (1) (while keeping other parameters  
 229 unchanged), thus, has a non-monotonic effect on the switching frequency (Figure 3 D).

## 230 2.2 Modulation of switching frequency by extrinsic noise

231 To investigate the effect of extrinsic noise on the switching times between the two neurons, we simulate  
 232 additive current noise ( $\xi$ , equation (1)). Recall that regular switching is orchestrated by calcium current and  
 233 intrinsic opening and closing timescale of the sAHP current. At intermediate current values, a minimum in  
 234 the coefficient of variation (CV) of switching response (Figure 4 A, blue) is observed that corresponds to a  
 235 minimum in sAHP rate (Figure 4 A, green). This indicates that the network is most insensitive to external  
 236 noise for a finite range of input current. At these values of intermediate current, the slow AHP current

237 integrates noisy input current best to maintain regular switching. At high input current and the consequent  
238 stronger depolarization, a higher threshold AHP fraction is needed to achieve termination of the burst. This  
239 makes the burst duration longer and an improved smoothening of the noisy input by the sAHP current.  
240 The filtering of noisy input is seen as a lower CVs and (see Figure 4 A blue) the cumulative effect of the  
241 fluctuations is seen as an increased switching frequency.

242 We show that switching frequency (Figure 4 B, C (black) and D) increases with noise amplitude. The  
243 switching frequency for three illustrative current values as a function of noise amplitude is shown in (Figure  
244 4 D).

245 The role of sAHP current in increasing the switching frequency in response to noisy inputs can be  
246 understood in the following way: Current noise causes voltage fluctuations leading to fluctuations in  
247 the voltage-gated calcium current. The sAHP current can note each of these fluctuations in calcium  
248 concentration due to its fast rise-time. However, as the sAHP current's decay-time is long, the rise in sAHP  
249 due to calcium fluctuations accumulates over time and leads to a quicker build-up of sAHP current (Figure  
250 4 E), green). The faster build-up of sAHP terminates the burst earlier, increasing the switching frequency  
251 (Figure 4 C, black) with a minor increase in the CV of switching (Figure 4 C, blue). The stochastic calcium  
252 signal is filtered with a slow decay-time of the sAHP current and only the summation over time rather than  
253 the individual calcium fluctuations dictate the termination of the burst. The increase in switching frequency  
254 mediated by noise goes up with amplitude of input current (Figure 4 D).

255 In figure 4 F, the percentage change in switching frequency range (calculated as:

256  $\frac{[f_{max} - f_{min}]_{noise\ amp}}{[f_{max} - f_{min}]_{no\ noise}} \times 100$ ) is shown. The addition of noise increases the range of switching frequencies  
257 achieved by  $\sim 350\%$  at noise amplitude 0.2. In summary reliable switching over a wider range of  
258 frequencies can be achieved by input noise due to the biophysical properties of the sAHP current.

### 259 **2.3 Modulation by intrinsic noise: effect of calcium pulse failures on switching** 260 **dynamics**

261 To further examine the sensitivity of sAHP response to the fluctuations in calcium current, we introduce  
262 random calcium pulse failures at a varying rates. Increasing the rate of calcium pulse failure decreased the  
263 switching frequency (Figure 5 A) due to a slower build-up of sAHP current (increasing number of calcium  
264 pulses are missed by sAHP current). Predictably, the increase in the failure rate has the effect of increasing  
265 the CV of switching (Figure 5 A). In the presence of a "stochastically faulty" calcium pulse generator, more  
266 action potentials need to be fired by the neuron to achieve the threshold sAHP current to terminate the burst.  
267 We show the increase in the failure rate (probability) leads to an increase in the number of action potentials  
268 per burst (Figure 5 B). Needing more action potentials to achieve the burst termination also makes the burst  
269 longer. Thus switching frequency decreases with the increase in the number of action potentials in the burst  
270 (Figure 5 C). A linear decrease in switching frequency with increasing the failure rate (Figure 5 A) is seen.  
271 Interestingly, similar trends are seen for independent random trials of the calcium pulse failures occurring  
272 randomly during the epoch of the burst. The invariance to the temporal position of missed calcium pulses  
273 during the burst indicates that the switching behavior is dictated by the number of calcium pulses causing  
274 the build of sAHP current and is insensitive to the temporal order of these calcium pulses.

275 To systematically test the insensitivity of the sAHP current to the temporal characteristic of the stimulus  
276 train, we induced one failure per burst. We changed the position of the calcium pulse failure relative to the  
277 initiation of the burst. We see that the position of the failure does not affect the switching frequency for  
278 most of the burst and only affects towards the end of the burst( above 900 msec in failure position) (Figure

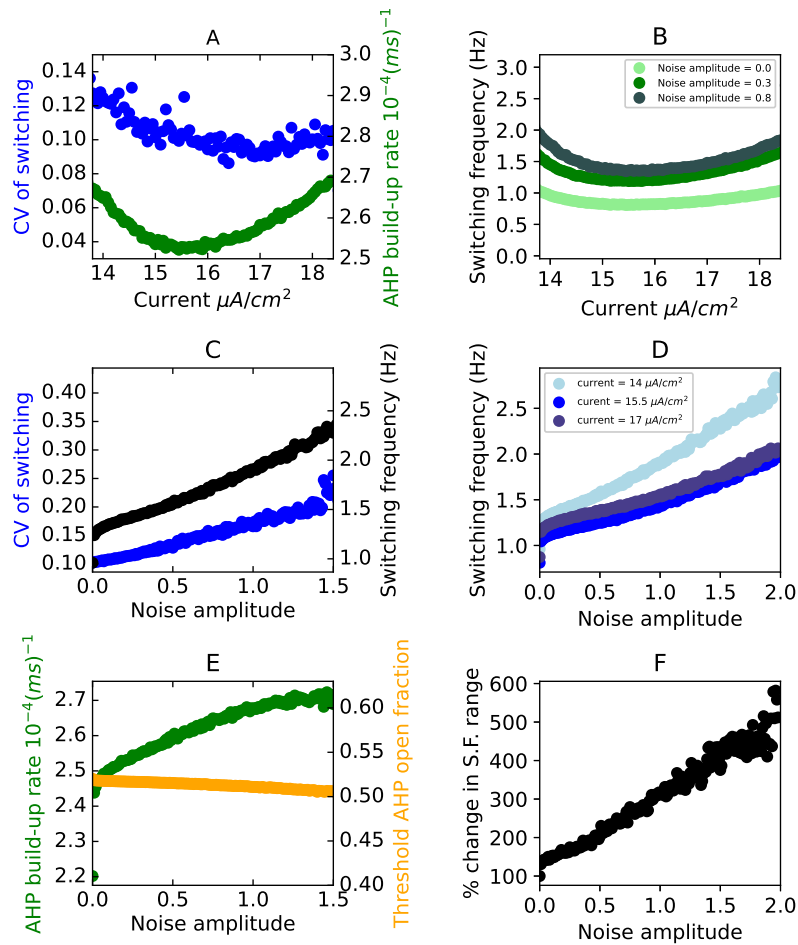

**Figure 4.** Optimal excitability helps in maintaining reliable switching in the presence of extrinsic noise: A. The minimum in the sAHP build-up (green) rate corresponds to a minimum in the CV of switching (blue) for noise amplitude 0.8. B. The switching frequency increases on increasing the amplitude of the noise. C. The switching frequency (black) and the CV of switching (blue) increase on increasing the noise amplitude for current =  $14\mu\text{A}/\text{cm}^2$ . D. Switching frequency versus the noise amplitude for three driving current values. E. The rate of sAHP-build (green) increases as the noise amplitude is increased. In contrast, the threshold sAHP conductance (open fraction in yellow) remains almost constant on increasing the noise amplitude for current =  $14\mu\text{A}/\text{cm}^2$ . F. The switching frequency increases by  $\sim 350$  percent for current =  $14\mu\text{A}/\text{cm}^2$  with the addition of noise along with some unreliability in switching (CV=0.2 at noise amplitude =1.5).

279 5 D, blue). The failure at the end of the burst has a drastic effect on the switching frequency. At the end of  
 280 the burst, the depolarization is weak, and the inhibition from the inhibiting neuron is strong. Thus missing  
 281 a calcium pulse close to the termination of the burst reduces the depolarizing current to the neuron. In the  
 282 meantime, the other neuron takes over and inhibits the neuron whose burst is about to end. This results in  
 283 increased switching frequency when calcium failures appear at the end of the burst (Figure 5 D blue). A  
 284 missed calcium pulse here also increases irregularity in switching (Figure 5 D, green). However, the CV of  
 285 the switching remains the same for most missed temporal positions of the calcium pulse. This is illustrated  
 286 in Figure 5 D, green. In summary, the sAHP current serves as an action potential counter and makes the  
 287 neuron insensitive to the variations in temporal patterns of the stimulus.

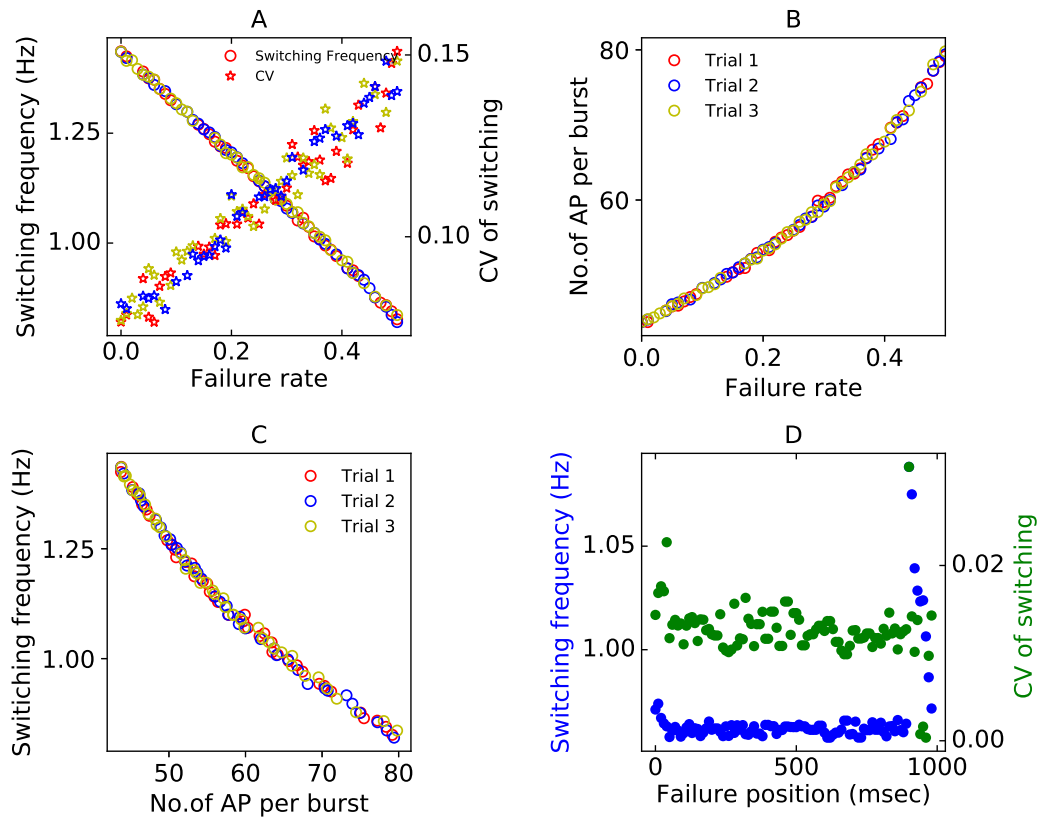

**Figure 5.** Switching dynamics in the presence of calcium pulse failures. A. The mean switching frequency(circles) and CV of switching(stars) for changing three different trials of calcium pulse failures for a range of failure rates. B. Average number of action potentials in a burst as a function of failure rate. C. The Switching frequency is a function of failure rate and correlates negatively with the number of APs per burst. D. One single calcium pulse failure is induced, and the position of failure is varied during the burst (failure position zero indicates that the failure happened as the initiation of the burst and failure position 1000 indicates that the failure happened after 1000 msec of the burst initiation.) Switching frequency (blue) and CV (green) of switching as a function of failure position.

## 288 2.4 Modulation of switching frequency by calcium channel noise

289 The slow closing times of the sAHP channels result in the sAHP current maintaining a long memory of  
 290 these fluctuations. The stochastic opening of calcium channels is the most significant contributor to the  
 291 variability in synaptic release (Modchang et al., 2010). In order to isolate the effect of calcium channel  
 292 stochasticity on switching, markovian opening and closing of channels were simulated; however, the rest  
 293 of the system equations were simulated deterministically. Recall that our two neuron system has intrinsic  
 294 timescales that vary over a wide range (over two orders of magnitude  $\tau_{sAHP} = 1.5sec, \tau_{cal} = 14msec$   
 295 (Stanley et al., 2011)). The extant algorithms for Markovian simulations; Gillespie algorithm (Gillespie,  
 296 1976b) and the (Goldwyn and Shea-Brown, 2011) introduce errors that accumulate with time due to the  
 297 intrinsic differences in timescales. We, therefore, developed an updating system for variables that we call  
 298 the Tandem Progression Gillespie or TPG algorithm (See methods for details). According to TPG; 1)  
 299 transitions in the calcium channel opening get updated according to the Gillespie algorithm and 2) the  
 300 deterministic changes in the rest of the variables (activation and inactivation gates of the ion channels) get  
 301 updated according to an Euler integrator. Thus by updating the whole system together at a time that arises

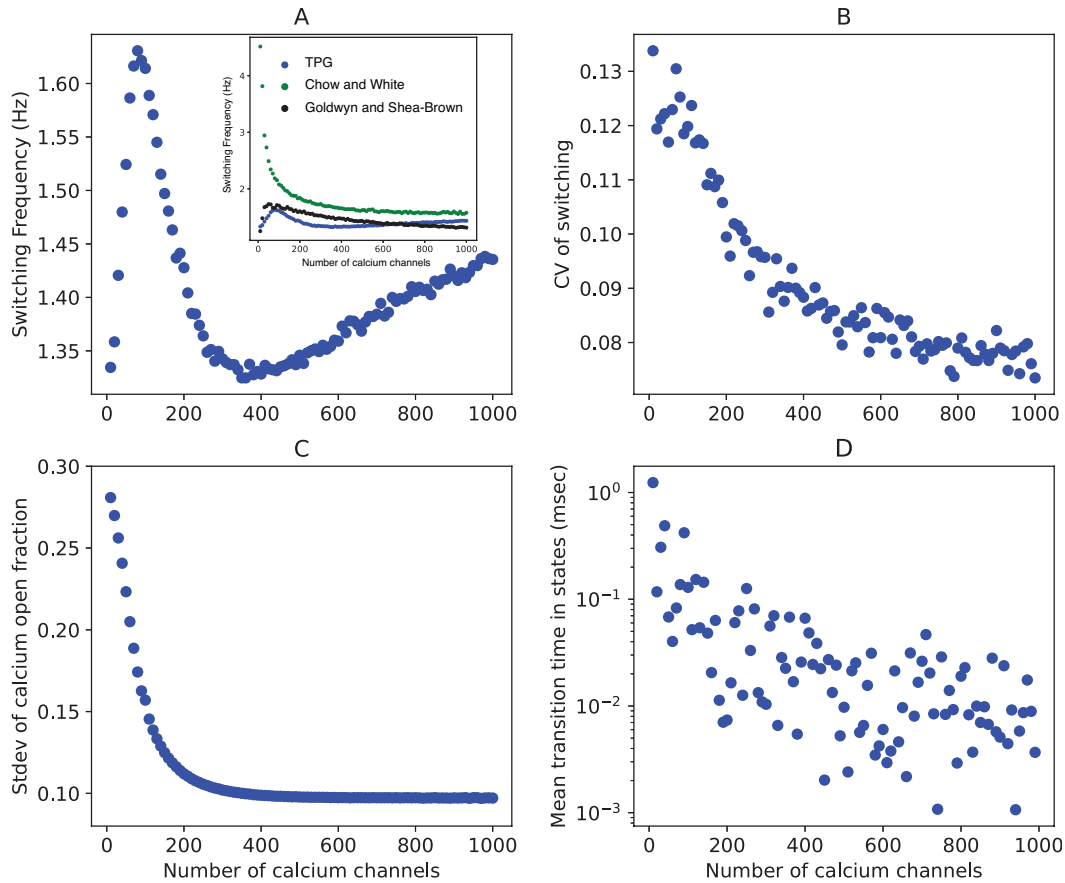

**Figure 6.** Opposite effects of increasing the number of channels leads to non-monotonic variation in switching frequency. A: The switching frequency shows a non-monotonic trend with increasing the number of calcium channels. B: The switching becomes more regular as the amplitude of fluctuations decreases with the increasing of the number of calcium channels. C: The fluctuations in the open fraction of calcium channels become smaller in amplitude with the increasing channel number. D: The mean transition time in the calcium channel states decreases as channel number is increased, leading to increased frequency of fluctuations in calcium concentration.

302 either out of the calcium channel fluctuations or voltage equations, the dynamics of this multi-timescale  
303 system evolved more accurately.

304 We see that the switching frequency follows a non-monotonic trend with increasing the number of  
305 VGCCs (Figure 6 A). The CV of switching decreases with increasing channel numbers (Figure 6 B) as the  
306 fluctuations become smaller in amplitude when the number of calcium channels is increased (Figure 6 C).  
307 Beyond about 100 VGCCs, the switching frequency decreases as the number of VGCCs is increased. The  
308 waiting times from the Gillespie algorithm become shorter as the number of VGCCs are increased (Figure  
309 6 D). When the number of VGCCs is further increased, beyond 400 VGCCs, the fluctuations become  
310 smaller in amplitude, but their frequency increases (Compare Figure B and D). Due to the slow timescales  
311 of the sAHP current, these closely spaced fluctuations add up in sAHP current leading to a faster build-up  
312 of sAHP current resulting in the increase trend in switching frequencies at large numbers of VGCCs. Thus  
313 the increasing the calcium channel numbers causes a) decrease in the amplitude of fluctuations, b) an  
314 increase in the frequency of fluctuations, which have opposing effects on the switching frequency. The two  
315 opposing effects cause the non-monotonic trend is observed in the switching frequency upon increasing the

316 number of calcium channel numbers. These simulations are carried out for the same maximum conductance  
317 of the calcium current.

### 3 DISCUSSION

318 It is conjectured that the brain is fundamentally a rhythm generating machine (Buzsáki, 2006). All functions  
319 of the brain, from motor patterns, breathing to cognition, emerge from various rhythms. Reciprocal inhibi-  
320 tion between neuron pairs is ‘the’ building block that generates stable anti-phasic and multiphasic output  
321 patterns. The switching in these reciprocally inhibited networks occurs due to either intrinsic biophysical  
322 properties of ionic currents that assign a distinct periodicity to the rhythm or an external drive. There is a  
323 distinct advantage in studying these systems; for one, the possibility of direct experimental intervention  
324 in isolation to understand the intrinsic basis of rhythm. The other, is the tractable characterization of the  
325 rhythm in terms of burst-interval, cycle period, phase relationships that, by definition, repeat themselves.

326 We, too, have capitalized on this simple-most network capable of rich dynamical behavior. The central  
327 essence of rhythm generation, to be functionally relevant, is the regularity of the rhythm. We investigate  
328 how intrinsic and extrinsic noise affect the regularity of the switching of activity in two mutually inhibiting  
329 neurons. Switching in our model takes place due to the calcium-mediated potassium current (sAHP)  
330 build-up. The sAHP current allows one neuron to ‘escapes from inhibition’ of the other (Wang and Rinzel,  
331 1992). Previous studies have investigated the role of noise in modulating neuronal firing rates (McDonnell  
332 and Abbott, 2009; Schmid et al., 2001; Wang, 1998; Nesse et al., 2008b,a). Current noise either reduces or  
333 enhances the gain of the firing frequency–current relationship depending on the type of intrinsic currents  
334 associated with the cell (Higgs et al., 2006). Noise is also seen to induce higher switching frequencies  
335 in CPGs of the rat spinal cord (Taccola, 2011). Some of the other consequences of extrinsic factors on  
336 the switching frequency of two mutually inhibiting neurons are described by Skinner et al.(Skinner et al.,  
337 1994). Our results demonstrate the non-monotonic effect of increasing external current on switching  
338 frequency. The initial decrease followed by the increase in switching frequency occurs because of the  
339 competing impact of increasing the external current ( Figure 3); faster build-up of on sAHP current and  
340 higher-threshold acquired to escape from inhibition. Neuromodulators can modulate biophysical properties  
341 such as the channel conductance and calcium-binding rates (Schwartz et al., 2005) and can further modulate  
342 the range of switching repertoire of the network. It would be interesting to study, for example, the role of  
343 5-HT in modulating the rhythm of the network (Kozlov et al., 2001).

344 We describe the effect of varying amplitude of current noise amplitude (Figure 4) on the switching  
345 dynamics. One of the most interesting insights from our study is that the switching frequency repertoire  
346 of the network is extended when current noise is introduced in the simulations (Figure 4). An analytical  
347 description of this phenomenon that uses a phenomenological neuron (Fitzhugh -Nagumo neuron) as an  
348 oscillatory system with multiple-separable timescales appears in Nesse et al. (Nesse et al., 2008a). We find  
349 that this noise-induced enhancement of the dynamical range of switching takes place at a small cost of an  
350 increase in variability. The CV of switching is also seen to depend on the amplitude of the external current  
351 stimulus (Figure 4C, A and D. Reliable switching in the presence of noise over a range of driving current  
352 indicates a match between the calcium spike frequencies driven by the current stimulus and the timescale  
353 sAHP over which sAHP integrates the current fluctuations. A similar mechanism via a match in timescales  
354 of fluctuations and sAHP current could explain the regular switching seen in many systems such as the  
355 Lamprey locomotion CPG and pre-Botzinger complex (Nesse et al., 2008b; Cangiano and Grillner, 2004).  
356 It may not always be possible to update a biological system’s intrinsic parameters in an activity-dependent



357 manner. Here we show that external noise can be advantageous rather than a hindrance and extend the  
358 neuron's dynamic range.

359 We examined the effect of calcium channel fluctuation, the most significant intrinsic noise source in  
360 neurons (Modchang et al., 2010). Forcing random failures in calcium spikes leads to the linear dependence  
361 of switching frequency on the failure rate (Figure 5). We also show that the rate of switching is invariant  
362 over multiple trials, i.e., switching frequency is insensitive to the position of failure of the calcium spike.  
363 This invariability over numerous trials demonstrates that sAHP current is a spike counter and can serve  
364 as a temporal integrator. Temporal integration has been implicated in audio and visual systems and  
365 involves collating spike patterns over time to improve detection or discrimination (Saija et al., 2019). A  
366 good temporal integrator requires that it maintain an average rhythm that is unaffected by input noise.  
367 The network with sAHP current can serve that purpose. A slow afterhyperpolarization that rises from  
368  $Na^{+1}/K^{+1}$  pump dynamics can also act as an integrator of spike number and serve as cellular memory  
369 on the time scales of the cycle periods of the locomotion rhythms (Pulver and Griffith, 2010). Separately,  
370 potassium current with slow inactivation has been implicated in modulating the synaptic plasticity and  
371 short term memory by changing the excitability of the cell (Turrigiano et al., 1996; Marder et al., 1996;  
372 Stackman et al., 2002). It would be interesting to investigate if sAHP dynamics simulated in our network  
373 would give rise to some form of cellular, short term memory.

374 The opening of calcium channels is rapid and closely follows the action-potential activity. However, as  
375 mentioned before, the response of the calcium-mediated potassium current, sAHP, is much slower (by order  
376 of magnitude). Thus each action potential leads to a fractional increase in the conductance of these channels.  
377 The firing ceases as the potassium current builds up over a train of action potentials. To account for fast  
378 calcium channel stochasticity and the slow cumulative increase sAHP, we modified the classical Gillespie  
379 algorithm (Gillespie, 1976b). We believe that the modified algorithm, TPG captures the fluctuations and  
380 progressions governing the neuronal and network dynamics over multiple timescales more accurately.

381 We also investigated the effect of varying calcium channel number while keeping the maximum conduc-  
382 tance the same on the network's switching dynamics (Figure 6). As expected, the CV of switching decreases  
383 as the channel number increases. However, the switching frequency has a non-monotonic dependence on  
384 the number of calcium channels. An upstroke in switching frequency is seen for a range of ion channel  
385 number ( $\sim 10 - 50$ ). The larger fluctuations in the fraction of open channels result in this behavior. As the  
386 open channel numbers fluctuate widely, the network has more significant excursions through switching  
387 intervals dictated by the open fraction. The waiting times for transitions between states of calcium channels  
388 are too long, and higher frequencies of switching are not achieved when a small number of calcium channels  
389 are present (Figure 6 D). Interestingly, the number of channels that orchestrate the highest switching  
390 frequencies ( $\sim 50 - 300$ ) are also realistic estimates for the number of L-type calcium channels present in  
391 the neuron. An increasing trend in switching frequency is seen again for large numbers of ion channels  
392 ( $> 500$ ). It is noteworthy that the switching frequency at these high channel numbers (Figure 6 A for  
393 current =  $14\mu A/cm^2$ ) is larger than the deterministic limit of switching frequency (Figure 3 D for current  
394 =  $14\mu A/cm^2$ ). The small waiting times due to the large population statistics of calcium channels (Figure  
395 6 D) lead to frequent fluctuations in the calcium current. A corollary insight from these calculations is  
396 that stochasticity also plays a role when channel numbers are large when slow dynamics are involved in  
397 contrast to the conventional belief. In sum, the competing effects of fluctuations and waiting times for  
398 calcium channels to change states lead to the non-monotonic behavior seen in switching frequency as we  
399 vary the number of calcium channels (Figure 6 A).

400 The brain is capable of generating regular firing patterns critical for several functions despite irregular  
401 inputs due to channel fluctuations, probabilistic neurotransmitter release diffusion of signaling molecules  
402 and probabilistic binding to receptors, etc. It is almost impossible to suppress all sources of noise experi-  
403 mentally. Computational modeling to isolate the consequences of noise to function is therefore valuable.  
404 Using a minimalistic model system for rhythm generation, our investigations have led to several novel  
405 insights into the contribution of noise to function. Each calcium fluctuation may not immediately affect  
406 the postsynaptic neuron; however, an ionic current like sAHP seems to keep an account of this miniature  
407 activity. We speculate that this may serve as a sub-cellular substrate of memory (Pulver and Griffith (2010)).

## **CONFLICT OF INTEREST STATEMENT**

408 The authors declare that the research was conducted in the absence of any commercial or financial  
409 relationships that could be construed as a potential conflict of interest.

## **AUTHOR CONTRIBUTIONS**

410 Suhita Nadkarni (SN) conceived the project. SN and Subhadra Mokashe (SM) designed the model  
411 simulations. SM ran the simulations. SM and SN analyzed the data. SM and SN wrote the manuscript.

## **FUNDING**

412 SN: Wellcome Trust/DBT India Alliance (grant number IA/I/12/1/500529). SM : Department of Science and  
413 Technology (DST), Government of India - Innovation in Science Pursuit for Inspired Research (INSPIRE)  
414 –DST/INSPIRE Fellowship, Indian Institute of Science Education and Research, Pune, and Wellcome  
415 Trust/DBT India Alliance (grant number IA/I/12/1/500529) and Science & Engineering Research Board,  
416 India (grant number PDF/2017/001803).

## **ACKNOWLEDGMENTS**

417 We would like to thank Dr. Collins Assisi for useful insights and past and present members of Nadkarni  
418 and Assisi labs for helpful discussions. SM would like to thank Dr. Satish Mokashe for helpful discussions  
419 and encouragement during the course of this project.

## **CODE AVAILABILITY STATEMENT**

420 The code is available at <https://github.com/subhadram/insilico>

## **REFERENCES**

- 421 Andreev, A. V., Makarov, V. V., Runnova, A. E., Pisarchik, A. N., and Hramov, A. E. (2018). Coherence  
422 resonance in stimulated neuronal network. *Chaos, Solitons & Fractals* 106, 80 – 85. doi:<https://doi.org/10.1016/j.chaos.2017.11.017>  
423 [//doi.org/10.1016/j.chaos.2017.11.017](https://doi.org/10.1016/j.chaos.2017.11.017)
- 424 Buzsáki, G. (2006). *Rhythms of the Brain* (New York: Oxford University Press). doi:10.1093/acprof:  
425 oso/9780195301069.001.0001
- 426 Cangiano, L. and Grillner, S. (2004). *Mechanisms of Rhythm Generation in the Lamprey Locomotor*  
427 *Network*. Ph.D. thesis, Karolinska Institute

- 428 Chow, C. C. and White, J. a. (1996). Spontaneous action potentials due to channel fluctuations. *Biophysical*  
429 *journal* 71, 3013–3021. doi:10.1016/S0006-3495(96)79494-8
- 430 Daun, S., Rubin, J. E., and Rybak, I. A. (2009). Control of oscillation periods and phase durations in  
431 half-center central pattern generators: A comparative mechanistic analysis. *Journal of Computational*  
432 *Neuroscience* 27, 3–36. doi:10.1007/s10827-008-0124-4
- 433 Dragoi, G. and Buzsáki, G. (2006). Temporal encoding of place sequences by hippocampal cell assemblies.  
434 *Neuron* 50, 145 – 157. doi:<https://doi.org/10.1016/j.neuron.2006.02.023>
- 435 Fox, R. F. and Lu, Y. N. (1994). Emergent collective behavior in large numbers of globally coupled  
436 independently stochastic ion channels. *Physical Review E* 49, 3421–3431. doi:10.1103/PhysRevE.49.  
437 3421
- 438 Gillespie, D. T. (1976a). A general method for numerically simulating the stochastic time evolution of  
439 coupled chemical reactions. *Journal of Computational Physics* 22, 403–434. doi:10.1016/0021-9991(76)  
440 90041-3
- 441 Gillespie, D. T. (1976b). A general method for numerically simulating the stochastic time evolution of  
442 coupled chemical reactions. *Journal of Computational Physics* 22, 403 – 434. doi:[https://doi.org/10.](https://doi.org/10.1016/0021-9991(76)90041-3)  
443 [1016/0021-9991\(76\)90041-3](https://doi.org/10.1016/0021-9991(76)90041-3)
- 444 Goldwyn, J. H. and Shea-Brown, E. (2011). The what and where of adding channel noise to the Hodgkin-  
445 Huxley equations. *PLoS Computational Biology* 7. doi:10.1371/journal.pcbi.1002247
- 446 Higgs, M. H., Slee, S. J., and Spain, W. J. (2006). Diversity of gain modulation by noise in neocortical  
447 neurons: Regulation by the slow afterhyperpolarization conductance. *Journal of Neuroscience* 26,  
448 8787–8799. doi:10.1523/JNEUROSCI.1792-06.2006
- 449 Hodgkin, A. L. and Huxley, A. F. (1990). A quantitative description of membrane current and its  
450 application to conduction and excitation in nerve. *Bulletin of Mathematical Biology* 52, 25–71. doi:10.  
451 1007/BF02459568
- 452 Hooper, S. and Moulins, M. (1989). Switching of a neuron from one network to another by sensory-induced  
453 changes in membrane properties. *Science* 244, 1587–1589. doi:10.1126/science.2740903
- 454 Kozlov, A., Kotaleski, J. H., Aurell, E., Grillner, S., and Lansner, A. (2001). Modeling of substance P  
455 and 5-HT induced synaptic plasticity in the lamprey spinal CPG: Consequences for network pattern  
456 generation. *Journal of Computational Neuroscience* 11, 183–200. doi:10.1023/A:1012806018730
- 457 Lu, J., Sherman, D., Devor, M., and Saper, C. B. (2006). A putative flip-flop switch for control of REM  
458 sleep. *Nature* 441, 589–94. doi:10.1038/nature04767
- 459 Manira, A., Tegner, J., Grillner, S., and Manira, A. E. L. (1994). Calcium-dependent potassium channels  
460 play a critical role for burst termination in the locomotor network in lamprey. *Journal of Neurophysiology*  
461 72, 1852–1861
- 462 Marder, E., Abbott, L. F., Turrigiano, G. G., Liu, Z., and Golowasch, J. (1996). Memory from the dynamics  
463 of intrinsic membrane currents. *Proceedings of the National Academy of Sciences of the United States of*  
464 *America* 93, 13481–13486. doi:10.1073/pnas.93.24.13481
- 465 McDonnell, M. D. and Abbott, D. (2009). What is stochastic resonance? Definitions, misconceptions,  
466 debates, and its relevance to biology. *PLoS Computational Biology* 5. doi:10.1371/journal.pcbi.1000348
- 467 Modchang, C., Nadkarni, S., Bartol, T. M., Triampo, W., Sejnowski, T. J., Levine, H., et al. (2010). A  
468 comparison of deterministic and stochastic simulations of neuronal vesicle release models. *Physical*  
469 *biology* 7, 026008. doi:10.1088/1478-3975/7/2/026008
- 470 Myre, C. D. and Woodward, D. J. (1993). Bistability, switches and working memory in a two-neuron  
471 inhibitory-feedback model. *Biological Cybernetics* 68, 441–449. doi:10.1007/BF00198776

- 472 Nesse, W. H., Borisyuk, A., and Bressloff, P. C. (2008a). Fluctuation-driven rhythmogenesis in an  
473 excitatory neuronal network with slow adaptation. *Journal of Computational Neuroscience* 25, 317–333.  
474 doi:10.1007/s10827-008-0081-y
- 475 Nesse, W. H., Del Negro, C. A., and Bressloff, P. C. (2008b). Oscillation regularity in noise-driven  
476 excitable systems with multi-time-scale adaptation. *Physical Review Letters* 101, 3–6. doi:10.1103/  
477 PhysRevLett.101.088101
- 478 Otto Friesen, W. (1994). Reciprocal inhibition: A mechanism underlying oscillatory animal movements.  
479 *Neuroscience and Biobehavioral Reviews* 18, 547–553. doi:10.1016/0149-7634(94)90010-8
- 480 Pelkey, K. A., Chittajallu, R., Craig, M. T., Tricoire, L., Wester, J. C., and McBain, C. J. (2017).  
481 Hippocampal GABAergic Inhibitory Interneurons. *Physiological reviews* 97, 1619–1747. doi:10.1152/  
482 physrev.00007.2017
- 483 Pulver, S. R. and Griffith, L. C. (2010). Spike integration and cellular memory in a rhythmic network from  
484 Na<sup>+</sup>/K<sup>+</sup> pump current dynamics. *Nature Neuroscience* 13, 53–59. doi:10.1038/nn.2444
- 485 Sah, P. and Clements, J. D. (1999). Photolytic manipulation of [Ca<sup>2+</sup>]<sub>i</sub> reveals slow kinetics of potassium  
486 channels underlying the afterhyperpolarization in hippocampal pyramidal neurons. *The Journal of*  
487 *neuroscience : the official journal of the Society for Neuroscience* 19, 3657–3664
- 488 Saija, J. D., Başkent, D., Andringa, T. C., and Akyürek, E. G. (2019). Visual and auditory temporal  
489 integration in healthy younger and older adults. *Psychological Research* 83, 951–967. doi:10.1007/  
490 s00426-017-0912-4
- 491 Schmid, G., Goychuk, I., and Hänggi, P. (2001). Stochastic resonance as a collective property of ion  
492 channel assemblies. *Europhysics Letters (EPL)* 56, 22–28. doi:10.1209/epl/i2001-00482-6
- 493 Schwartz, E. J., Gerachshenko, T., and Alford, S. (2005). 5-HT prolongs ventral root bursting via presy-  
494 naptic inhibition of synaptic activity during fictive locomotion in lamprey. *Journal of neurophysiology*  
495 93, 980–8. doi:10.1152/jn.00669.2004
- 496 Skinner, F. K., Kopell, N., and Marder, E. (1994). Mechanisms for oscillation and frequency control  
497 in reciprocally inhibitory model neural networks. *Journal of Computational Neuroscience* 1, 69–87.  
498 doi:10.1007/BF00962719
- 499 Stacey, W. C. and Durand, D. M. (2001). Synaptic noise improves detection of subthreshold signals in  
500 hippocampal cal neurons. *Journal of Neurophysiology* 86, 1104–1112. doi:10.1152/jn.2001.86.3.1104.  
501 PMID: 11535661
- 502 Stackman, R. W., Hammond, R. S., Linardatos, E., Gerlach, A., Maylie, J., Adelman, J. P., et al. (2002).  
503 Small conductance Ca<sup>2+</sup>-activated K<sup>+</sup> channels modulate synaptic plasticity and memory encoding.  
504 *Journal of neuroscience* 22, 10163–10171
- 505 Stanley, D. A., Bardakjian, B. L., Spano, M. L., and Ditto, W. L. (2011). Stochastic amplification of  
506 calcium-activated potassium currents in Ca<sup>2+</sup> microdomains. *Journal of Computational Neuroscience*  
507 31, 647–666. doi:10.1007/s10827-011-0328-x
- 508 Taccola, G. (2011). The locomotor central pattern generator of the rat spinal cord in vitro is optimally  
509 activated by noisy dorsal root waveforms. *Journal of neurophysiology* 106, 872–84. doi:10.1152/jn.  
510 00170.2011
- 511 Tegnér, J., Hellgren-Kotaleski, J., Lansner, A., and Grillner, S. (1997). Low-voltage-activated calcium  
512 channels in the lamprey locomotor network: simulation and experiment. *Journal of neurophysiology* 77,  
513 1795–1812
- 514 Turrigiano, G. G., Marder, E., and Abbott, L. F. (1996). Cellular short-term memory from a slow potassium  
515 conductance. *Journal of neurophysiology* 75, 963–6

- 516 Wang, X. and Rinzel, J. (1992). Alternating and synchronous rhythms in reciprocally inhibitory model  
517 neurons. *Neural Computation* 4, 84–97. doi:10.1162/neco.1992.4.1.84
- 518 Wang, X.-J. (1998). Calcium coding and adaptive temporal computation in cortical pyramidal neurons. *J*  
519 *Neurophysiol* 79, 1549–1566. doi:10.1073/pnas.0712231105
- 520 White, J. A., Rubinstein, J. T., and Kay, A. R. (2000). Channel noise in neurons. *Trends in Neurosciences*  
521 23, 131–137. doi:10.1016/S0166-2236(99)01521-0
